# Supplementary material for: The reduction of cis-platinum(iv) complexes by ascorbate and in whole human blood models using 1H NMR and XANES spectroscopy
Source: Royal Society of Chemistry journal article supplement (doi:10.1039/c9mt00003h), 2019-02-23
Supplement: c9mt00003h1.pdf [file c9mt00003h1.pdf]

## Supporting information

### XANES calibration of standards

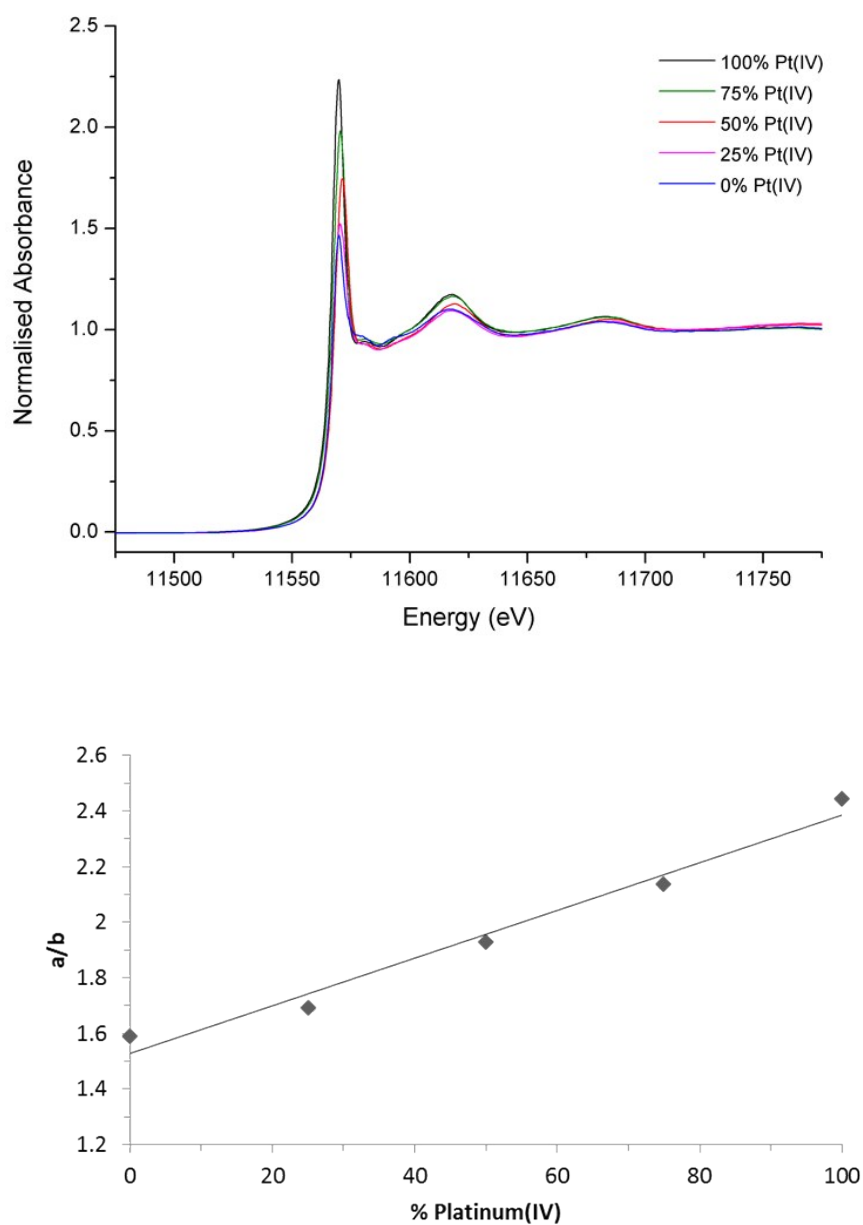

**Figure S1.** Normalised XANES spectra of  $[\text{PtCl}_2(\text{en})](\mathbf{X})$ ,  $\text{trans-}[\text{PtCl}_2(\text{OH})_2(\text{en})](\mathbf{I})$  and 25:75; 50:50; 75:25 molar ratio mixtures (top) and linear fit of peak height ratios,  $a/b$ , derived from XANES spectra of  $[\text{PtCl}_2(\text{en})](\mathbf{X})$ ,  $\text{trans-}[\text{PtCl}_2(\text{OH})_2(\text{en})](\mathbf{I})$  and 25:75; 50:50; 75:25 mixtures ( $R^2 = 0.975$ ) (bottom).

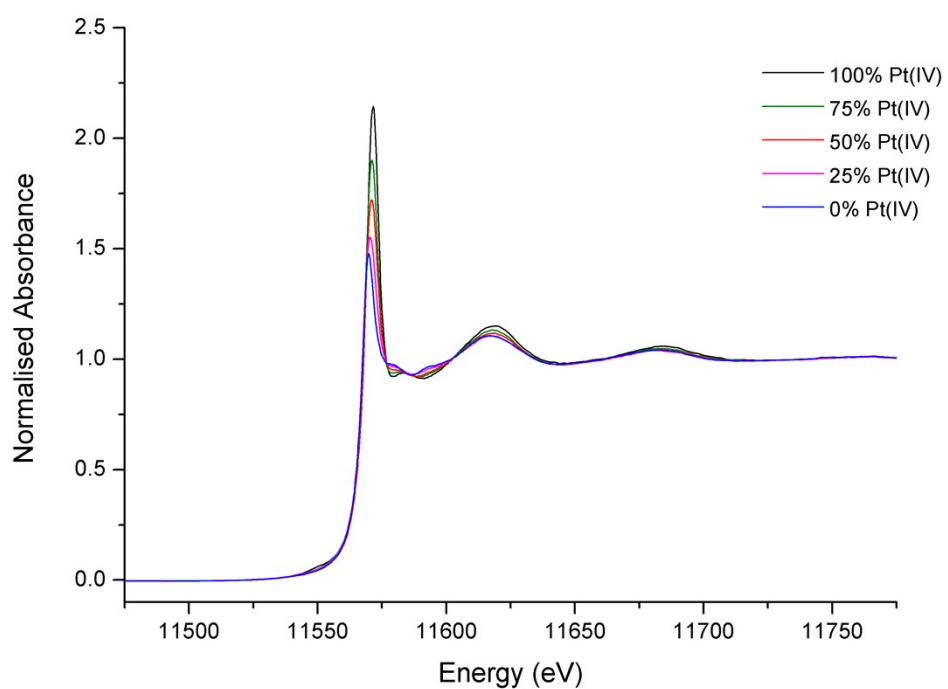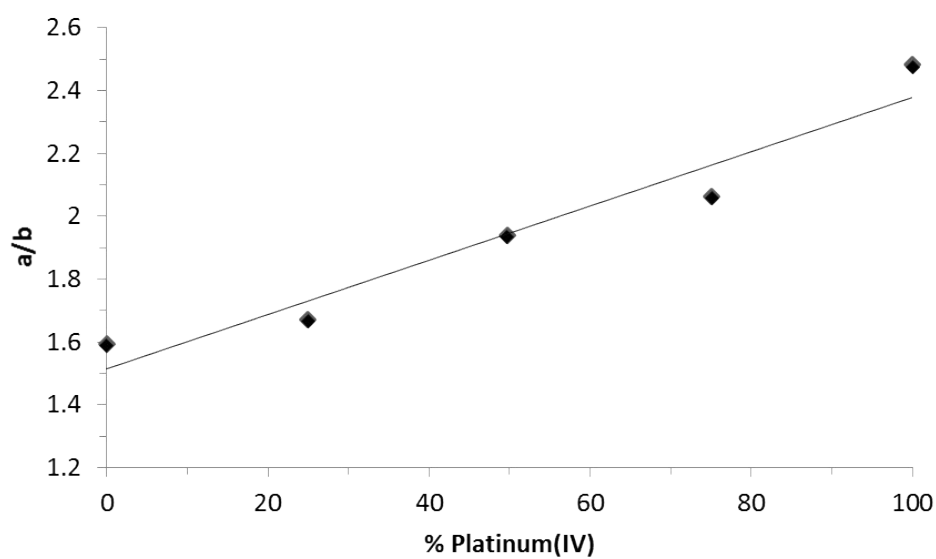

**Figure S2.** Normalised XANES spectra of  $[\text{PtCl}_2(\text{en})](\text{X})$ ,  $\text{trans-}[\text{PtCl}_2(\text{OAc})_2(\text{en})](\text{II})$  and 25:75; 50:50; 75:25 molar ratio mixtures (top) and linear fit of peak height ratios,  $a/b$ , derived from XANES spectra of  $[\text{PtCl}_2(\text{en})](\text{X})$ ,  $\text{trans-}[\text{PtCl}_2(\text{OAc})_2(\text{en})](\text{II})$  and 25:75; 50:50; 75:25 mixtures ( $R^2=0.939$ ) (bottom).

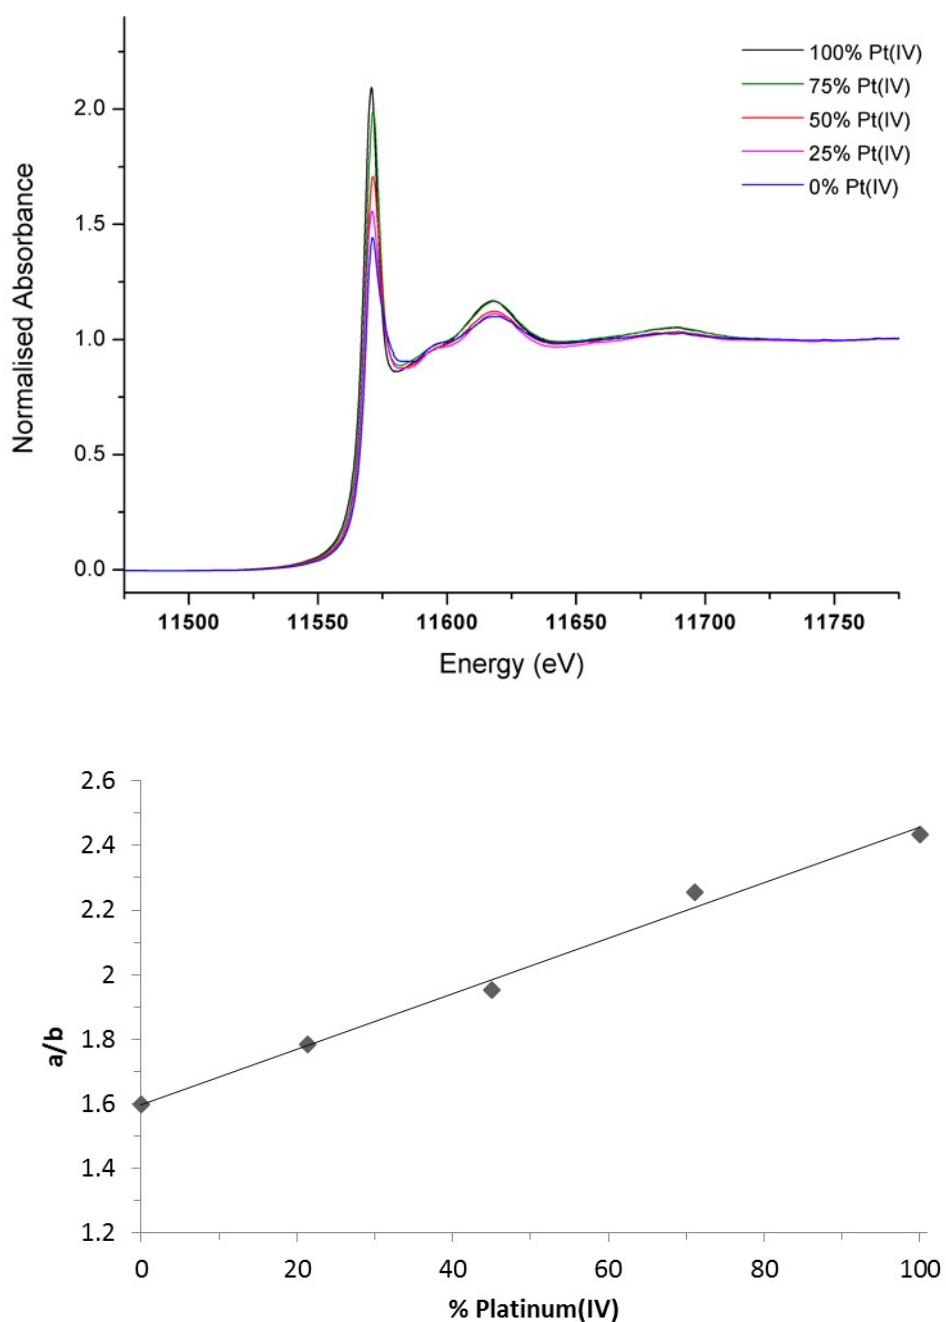

**Figure S3.** Normalised XANES spectra of  $[\text{Pt}(\text{ox})(\text{en})](\mathbf{XI})$ ,  $\text{trans-}[\text{Pt}(\text{OH})_2(\text{ox})(\text{en})](\mathbf{V})$  and 25:75; 50:50; 75:25 molar ratio mixtures (top) and linear fit of peak height ratios,  $a/b$ , derived from XANES spectra of  $[\text{Pt}(\text{ox})(\text{en})](\mathbf{XI})$ ,  $\text{trans-}[\text{Pt}(\text{OH})_2(\text{ox})(\text{en})](\mathbf{V})$  and 25:75; 50:50; 75:25 mixtures ( $R^2= 0.992$ ) (bottom).

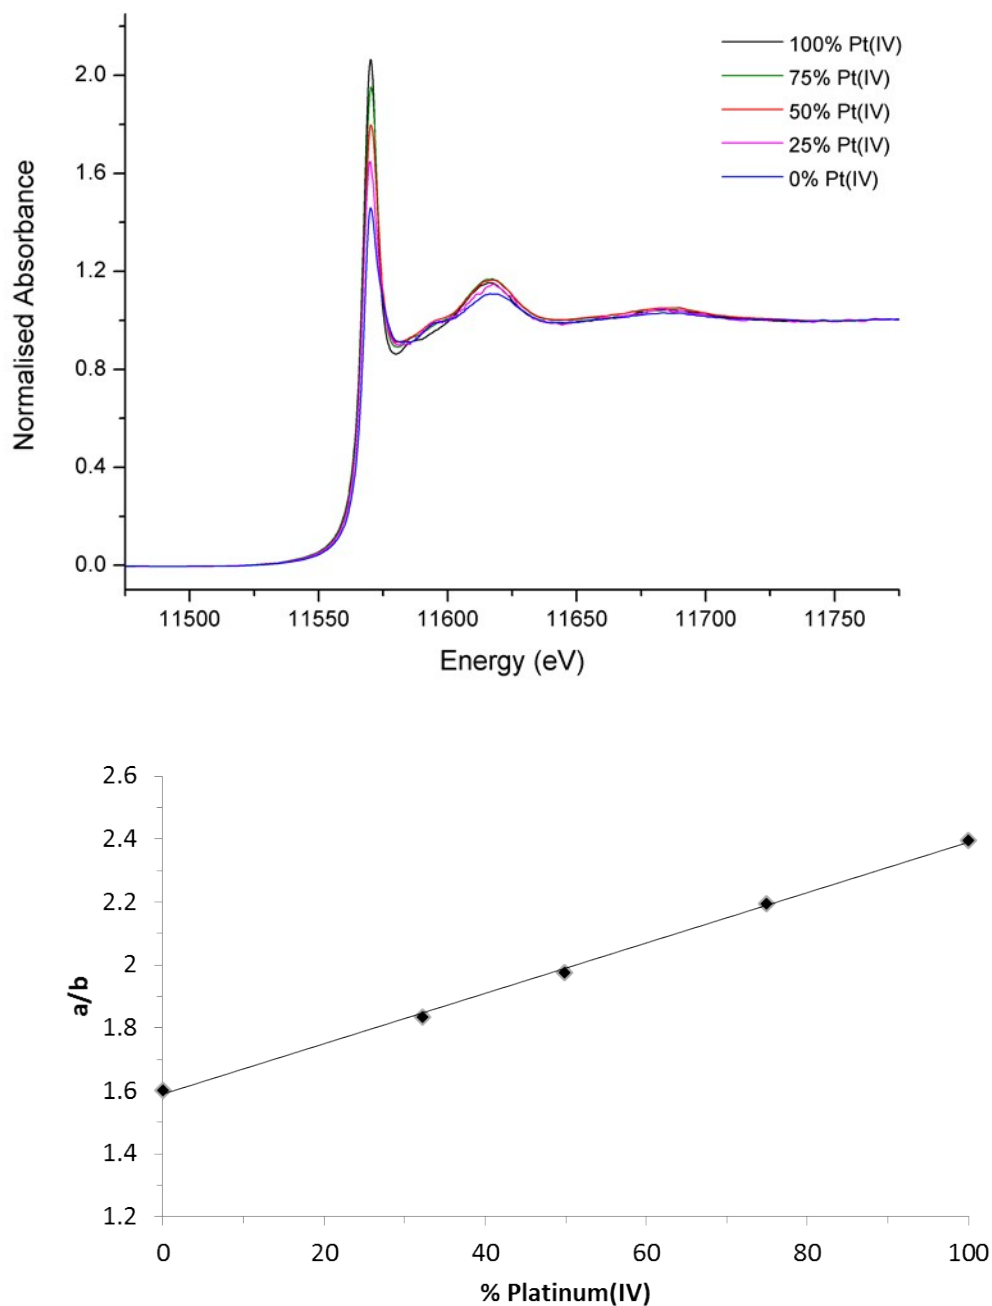

**Figure S4.** Normalised XANES spectra of  $[\text{Pt}(\text{ox})(\text{en})](\text{XI})$ ,  $\text{trans}-[\text{Pt}(\text{OAc})_2(\text{ox})(\text{en})](\text{VI})$  and 25:75; 50:50; 75:25 molar ratio mixtures (top) and linear fit of peak height ratios,  $a/b$ , derived from XANES spectra of  $[\text{Pt}(\text{ox})(\text{en})](\text{XI})$ ,  $\text{trans}-[\text{Pt}(\text{OAc})_2(\text{ox})(\text{en})](\text{VI})$  and 25:75; 50:50; 75:25 mixtures ( $R^2= 0.998$ ) (bottom).

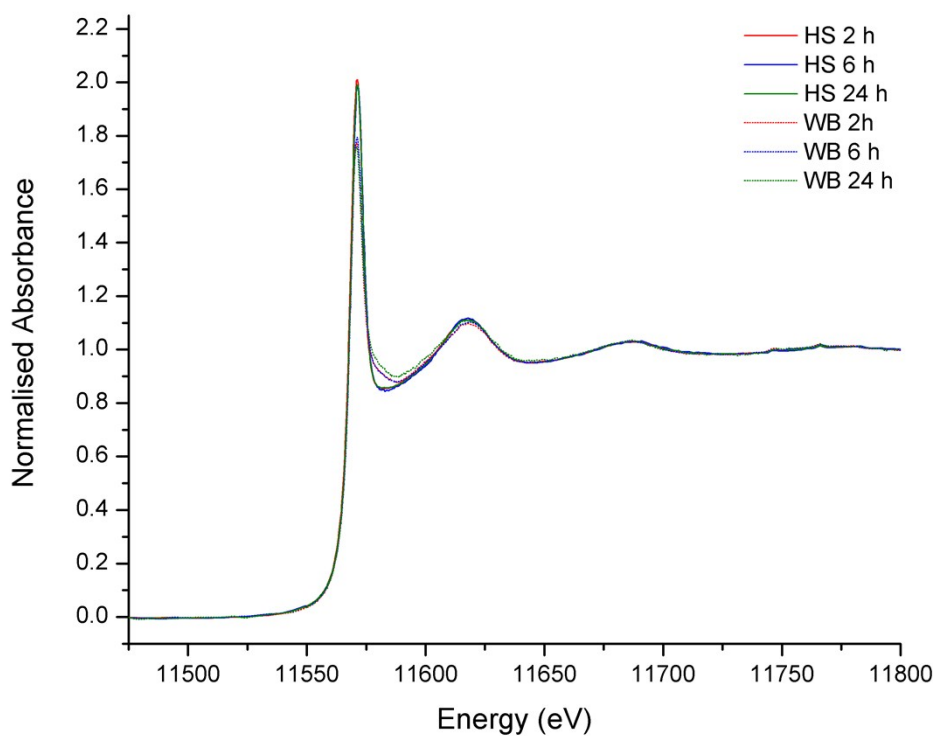

**Figure S5.** Normalized XANES spectra of whole human blood and blood serum incubated with *trans, cis*-[PtCl<sub>2</sub>(OH)<sub>2</sub>(en)] (**I**) for 2, 6, and 24 h.

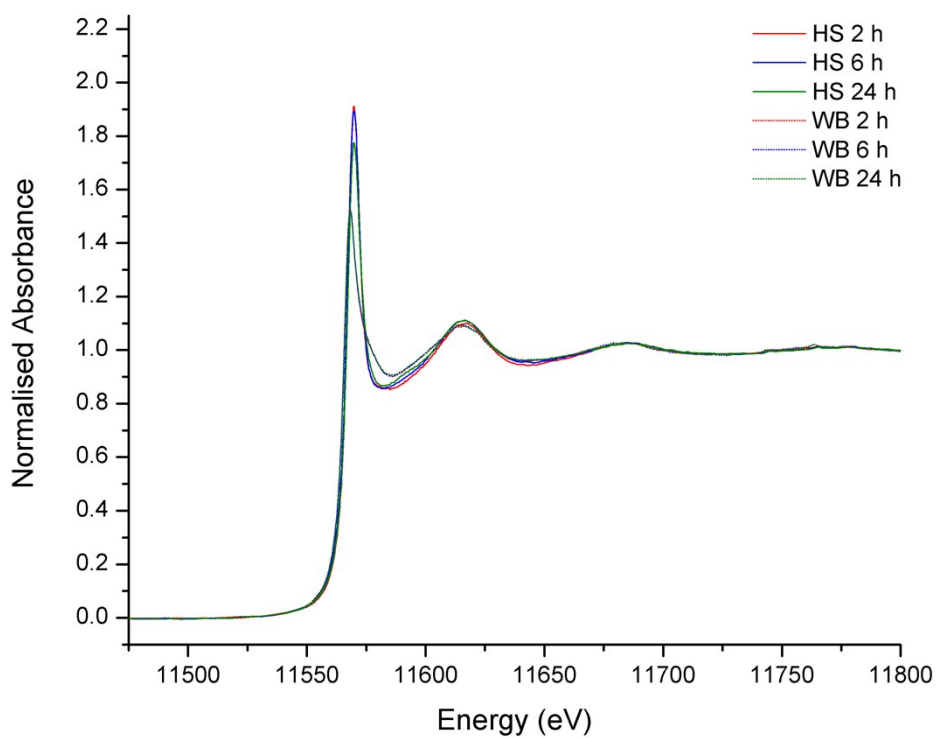

**Figure S6.** Normalized XANES spectra of whole human blood and blood serum incubated with *trans, cis*-[PtCl<sub>2</sub>(OAc)<sub>2</sub>(en)] (**II**) for 2, 6, and 24 h.

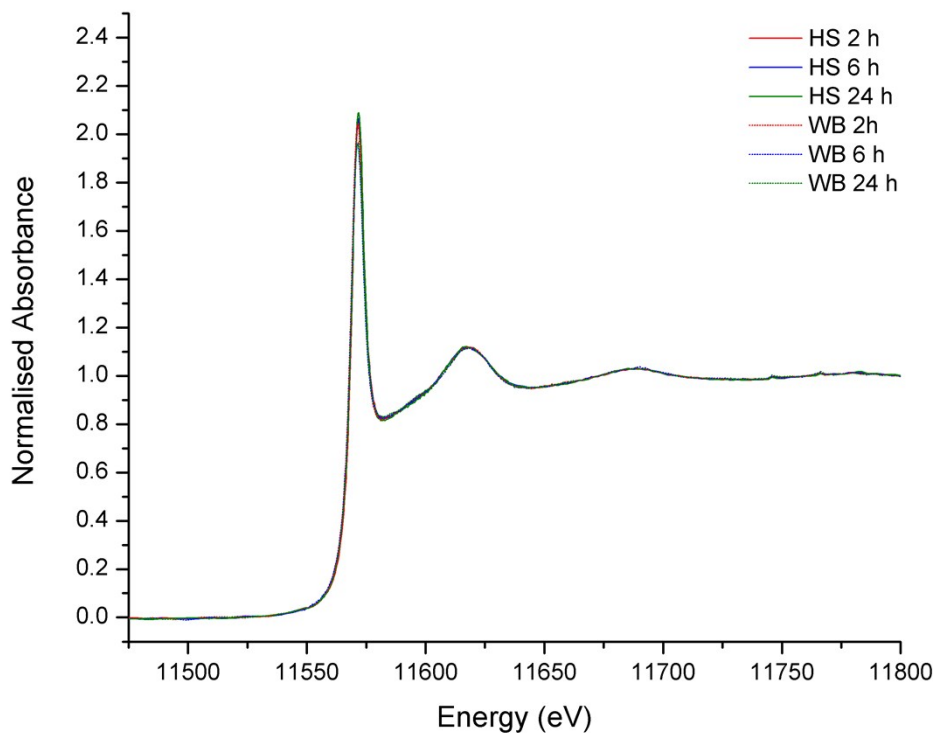

**Figure S7.** Normalized XANES spectra of whole human blood and blood serum incubated with *trans, cis*-[Pt(OH)<sub>2</sub>(ox)(en)] (**V**) for 2, 6, and 24 h.

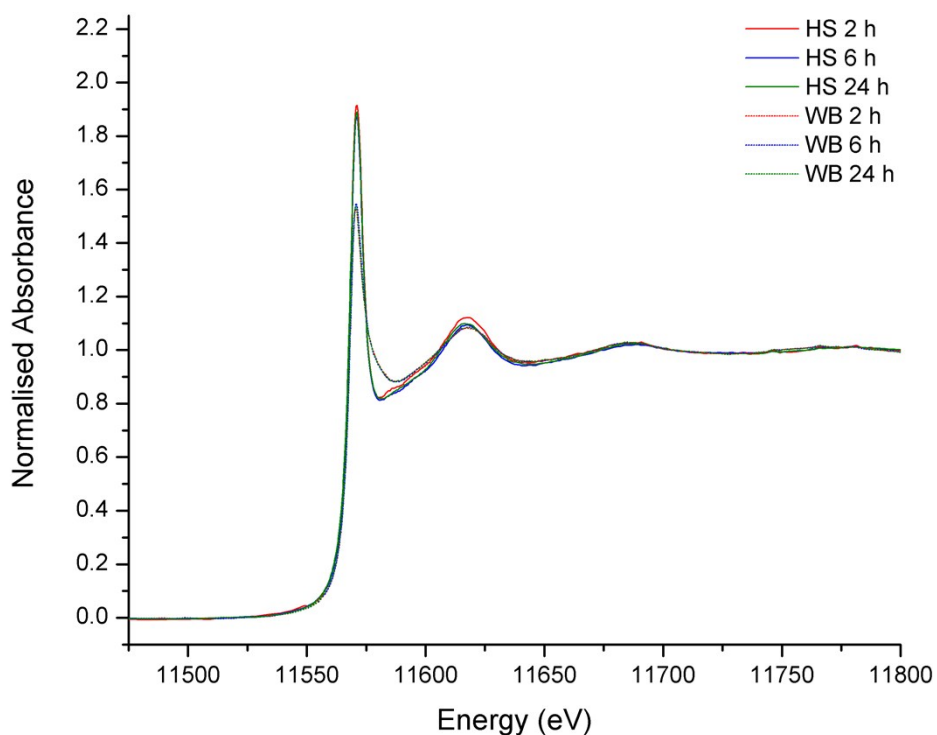

**Figure S8.** Normalized XANES spectra of whole human blood and blood serum incubated with *trans, cis*-[Pt(OAc)<sub>2</sub>(ox)<sub>2</sub>(en)] (**VI**) for 2, 6, and 24 h.

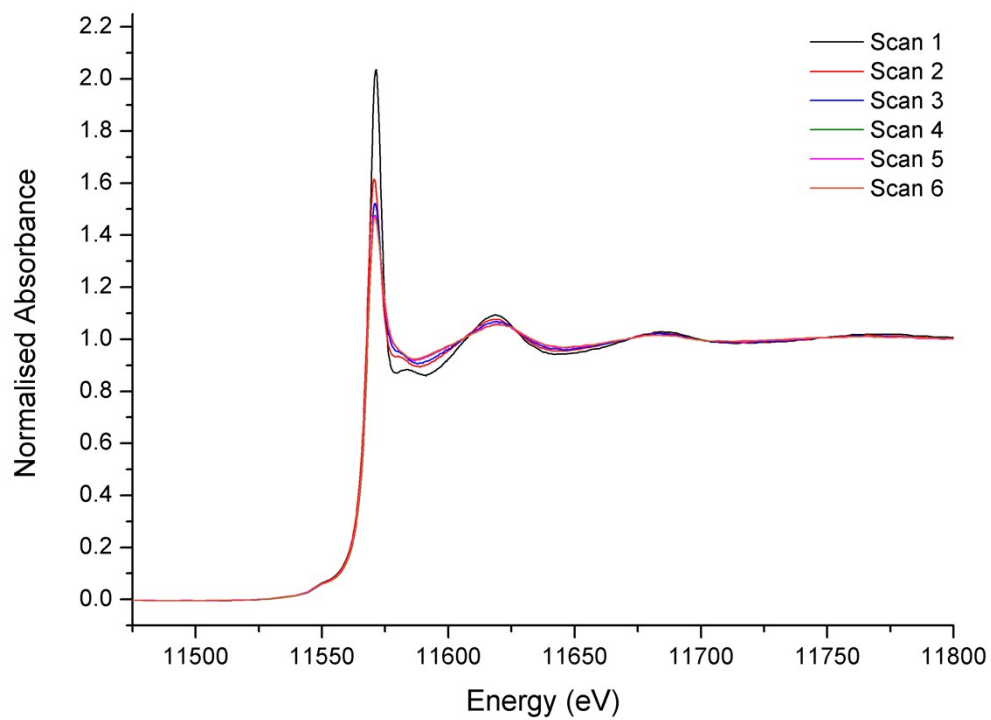

**Figure S9.** Radiation hardness testing of *trans*-[PtCl<sub>2</sub>(OAc)<sub>2</sub>(en)](II) by repeated XANES scans of the same region of the solid sample. Repeated radiation exposure resulted in the significant degradation of the sample in subsequent scans.
